# Supplementary material
Source: Springer Nature journal article supplement (https://www.springermedizin.de/resource/supplementary/13058_2010_9453_MOESM2_ESM.pdf/9702402)
Supplement: MOESM2 [file 9702402]

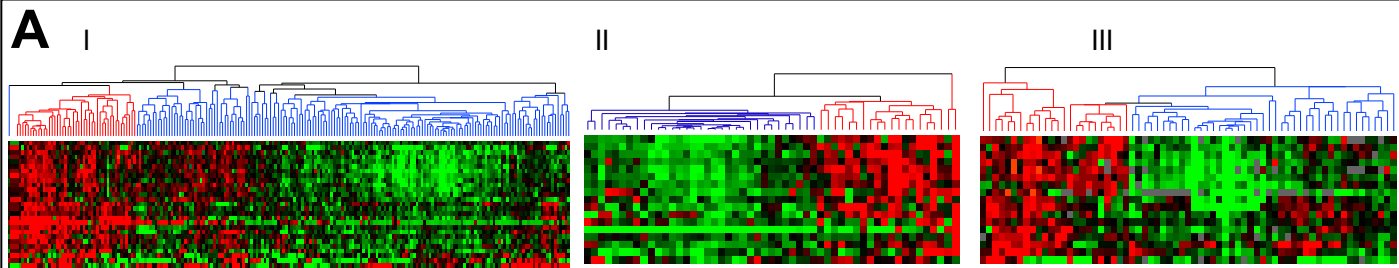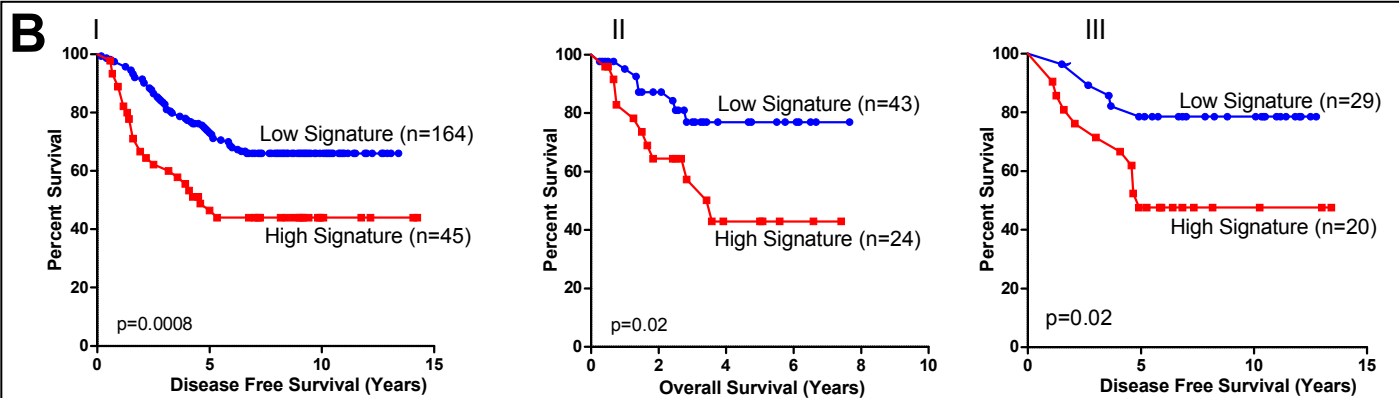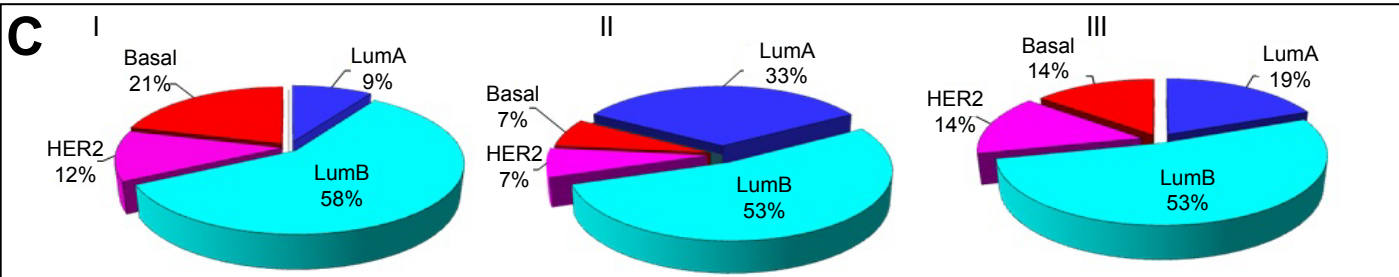

**D**

| 14-3-3 $\zeta$ Signature Dataset | Age          | Size         | Grade III vs I | PR+   | Lymph Node+  | Lum B vs Lum A | Metastasis   |
|----------------------------------|--------------|--------------|----------------|-------|--------------|----------------|--------------|
| <i>Frasor et al.</i>             | <b>0.04</b>  | <b>0.021</b> | <b>0.001</b>   | 0.07  | 0.433        | <b>0.001</b>   | <b>0.008</b> |
| <i>Sorlie et al.</i>             | NA           | 0.383        | <b>0.001</b>   | NA    | 0.430        | <b>0.001</b>   | 0.384        |
| <i>van't Veer et al.</i>         | <b>0.010</b> | <b>0.002</b> | <b>0.020</b>   | 0.180 | <b>0.040</b> | <b>0.001</b>   | <b>0.012</b> |
| <i>Wang et al.</i>               | NA           | NA           | NA             | NA    | NA           | <b>0.001</b>   | <b>0.019</b> |
